# Supplementary material for: Tuning the Liquid–Vapour Interface of VLS Epitaxy for Creating Novel Semiconductor Nanostructures
Source: MDPI journal article supplement (doi:10.3390/nano13050894), 2023-02-27
Supplement: s1 [file s1]

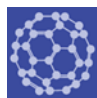

# Tuning the Liquid–Vapour Interface of VLS Epitaxy for Creating Novel Semiconductor Nanostructures

Galih R. Suwito <sup>1</sup>, Vladimir G. Dubrovskii <sup>2</sup>, Zixiao Zhang <sup>3</sup>, Weizhen Wang <sup>1</sup>, Sofiane Haffouz <sup>4</sup>, Dan Dalacu <sup>4</sup>, Philip J. Poole <sup>4</sup>, Peter Grutter <sup>3</sup> and Nathaniel J. Quitoriano <sup>1,\*</sup>

<sup>1</sup> Department of Mining and Materials Engineering, McGill University, Montreal, QC H3A 0C5, Canada

<sup>2</sup> Faculty of Physics, St. Petersburg State University, St. Petersburg 199034, Russia

<sup>3</sup> Department of Physics, McGill University, Montreal, QC H3A 2T8, Canada

<sup>4</sup> National Research Council Canada, Ottawa, ON K1A0R6, Canada

\* Correspondence: nate.quotiriano@mcgill.ca

Geometric ratio  $\alpha$  is defined as:

$$\alpha \equiv \frac{V}{H.L}, \quad (\text{S1})$$

where  $V$  is the total volume of the alloy in the micro-crucible,  $H$  is the thickness of the alloy, and  $L$  is the length of the opening. With the known plan-view area of the alloy in the micro-crucible  $A_{\text{cru}}$ , the geometric ratio  $\alpha$  can be estimated assuming that the thickness  $H$  is uniform across the micro-crucible:

$$\alpha \equiv \frac{A_{\text{cru}} \cdot H}{H.L} = \frac{A_{\text{cru}}}{L}. \quad (\text{S2})$$

Hence, by measuring the length of the opening  $L$  and the plan-view area of the alloy  $A_{\text{cru}}$ , we can estimate the values of the geometric ratio. Tables S1 and S2 show the measurements of the geometric ratios of micro-crucibles with small and large openings, respectively.

**Table S1.** Measurements of geometric ratios for micro-crucibles with small openings.

| No            | $L$ ( $\mu\text{m}$ ) | $A_{\text{cru}}$ ( $\mu\text{m}^2$ ) | $\alpha$ ( $\mu\text{m}$ ) |
|---------------|-----------------------|--------------------------------------|----------------------------|
| 1             | 11.79                 | 187.25                               | 15.89                      |
| 2             | 11.68                 | 177.91                               | 15.23                      |
| 3             | 11.85                 | 166.76                               | 14.07                      |
| 4             | 11.65                 | 156.11                               | 13.40                      |
| 5             | 11.65                 | 145.15                               | 12.46                      |
| 6             | 11.77                 | 132.76                               | 11.28                      |
| 7             | 11.46                 | 243.03                               | 21.21                      |
| 8             | 11.65                 | 227.30                               | 19.51                      |
| 9             | 11.72                 | 217.28                               | 18.54                      |
| 10            | 11.79                 | 210.60                               | 17.87                      |
| Mean $\alpha$ |                       |                                      | 15.95                      |

**Table S2.** Measurements of geometrics ratio for micro-crucibles with large openings.

| No            | $L$ ( $\mu\text{m}$ ) | $A_{\text{cru}}$ ( $\mu\text{m}^2$ ) | $\alpha$ ( $\mu\text{m}$ ) |
|---------------|-----------------------|--------------------------------------|----------------------------|
| 1             | 38.86                 | 481.22                               | 12.38                      |
| 2             | 45.32                 | 458.78                               | 10.12                      |
| 3             | 37.51                 | 583.23                               | 15.55                      |
| 4             | 47.21                 | 576.10                               | 12.20                      |
| 5             | 39.66                 | 486.86                               | 12.27                      |
| 6             | 45.52                 | 461.33                               | 10.13                      |
| 7             | 37.44                 | 579.98                               | 15.49                      |
| 8             | 47.34                 | 578.01                               | 12.21                      |
| Mean $\alpha$ |                       |                                      | 12.55                      |
